# Supplementary material
Source: PubMed Central journal article supplement (PMC6794695)
Supplement: Supplemental_Material.pdf [file Supplemental_Material.pdf]

**Supplementary Figure 1.** Quality of included randomized controlled trials based on the Cochrane Collaboration’s tool for assessing risk of bias.

|                 | Random sequence generation (selection bias) | Allocation concealment (selection bias) | Blinding of participants and personnel (performance bias) | Blinding of outcome assessment (detection bias) | Incomplete outcome data (attrition bias) | Selective reporting (reporting bias) | Other bias |
|-----------------|---------------------------------------------|-----------------------------------------|-----------------------------------------------------------|-------------------------------------------------|------------------------------------------|--------------------------------------|------------|
| Aroniadis, 2018 | +                                           | +                                       | +                                                         | +                                               | ?                                        | ?                                    | ?          |
| Halkjær, 2018   | +                                           | +                                       | +                                                         | +                                               | +                                        | +                                    | ?          |
| Holster, 2019   | +                                           | +                                       | +                                                         | +                                               | +                                        | +                                    | ?          |
| Holvoet, 2018   | +                                           | +                                       | +                                                         | +                                               | +                                        | +                                    | ?          |
| Johnsen, 2018   | +                                           | +                                       | +                                                         | +                                               | +                                        | +                                    | ?          |

## Supplementary Figure 2. Meta-analysis of changes in IBS-Severity Scoring System (IBS-SSS)

compared with baseline at 4-, 8- and 24-weeks treatment points in fecal microbiota transplantation (FMT) versus control.

### A. 4 weeks

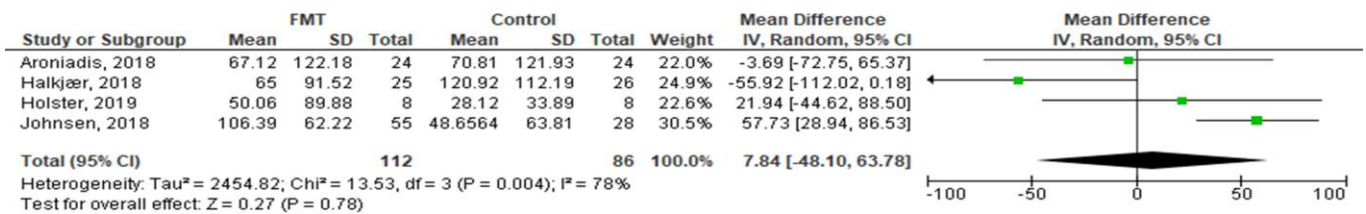

### B. 8 weeks

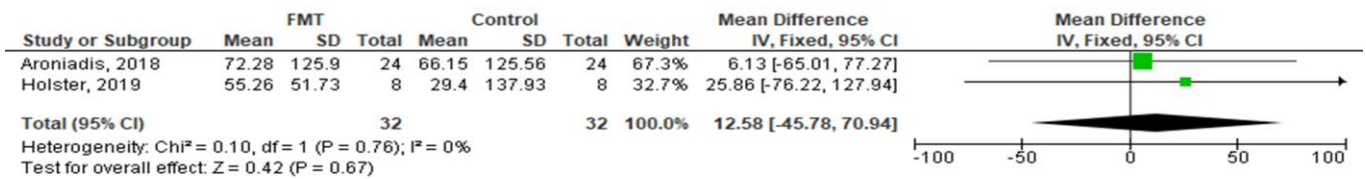

### C. 24 weeks

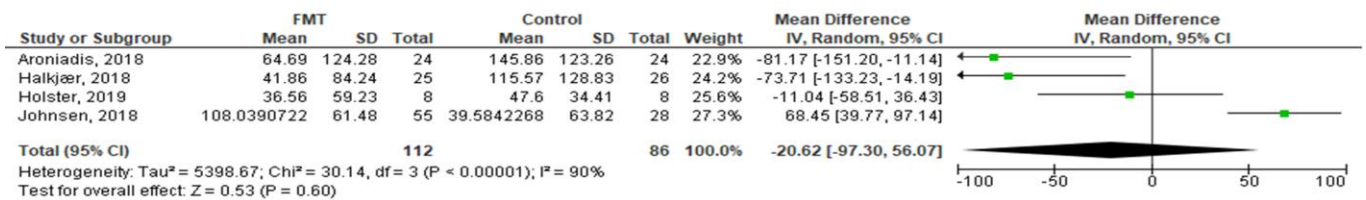

**Supplementary table 1. Level of evidence based on GRADE**

| No of studies                                                                              | Design | Limitations                               | Inconsistency | Indirectness | Imprecision | Publication Bias | Quality              | Importance |
|--------------------------------------------------------------------------------------------|--------|-------------------------------------------|---------------|--------------|-------------|------------------|----------------------|------------|
| <b>Improvement in in FMT vs. Control at 12 weeks</b>                                       |        |                                           |               |              |             |                  |                      |            |
| 4                                                                                          | RCT    | Autologous FMT as placebo in some studies | Very serious  | Not serious  | Serious     | Possible         | ⊕○<br>○○<br>Very LOW | Critical   |
| <b>Changes in IBS-SSS at 4, 8, 12 and 24 weeks compared to baseline in FMT vs. Control</b> |        |                                           |               |              |             |                  |                      |            |
| 2-4                                                                                        | RCT    | Autologous FMT as placebo in some studies | Very serious  | Not serious  | Serious     | Possible         | ⊕○<br>○○<br>Very LOW | Critical   |
| <b>Changes in IBS-QOL at 12 weeks compared to baseline in FMT vs. Control</b>              |        |                                           |               |              |             |                  |                      |            |
| 3                                                                                          | RCT    | Autologous FMT as placebo in some studies | Very serious  | Not serious  | Serious     | Possible         | ⊕○<br>○○<br>Very LOW | Critical   |
